# Supplementary material
Source: publisher site journal article supplement (https://www.dovepress.com/article/483118)
Supplement: Supplementary file 1 [file get_supplementary_file.php]

**Figure S1 Questionnaire**

**Clinical cognition and treatment options for behavioral and psychological symptoms of dementia (BPSD) in China**

**Objective**: BPSD has a high prevalence in patients with dementia, which can seriously increase caregiver stress, increase hospitalization rates, and impose a huge burden on the socioeconomic situation. Despite the high prevalence, only a few dedicated clinical tools (scales/questionnaires) or biomarkers have been used to detect symptoms of BPSD, resulting in an underestimated prevalence. In addition, little is known about the neurobiological basis of BPSD, and research on specific biomarkers associated with it is lacking, so there is currently no targeted treatment. Although non-pharmacological treatment is currently considered first-line treatment and pharmacological treatment is recommended as a second-line option, there is no consensus in clinical practice. In this context of uncertainty in diagnosis, detection, and treatment, it is very important to better define BPSD and develop clinical tools specifically for BPSD. This study intends to conduct a questionnaire survey on the clinical cognition of BPSD and the treatment strategies adopted among Chinese doctors, which is the first step to achieve the above goals.

**QUESTIONNAIRE**

| **General Information**  **1. Your province and city (county):**  **2. Your hospital is:**  General hospital  Specialized hospital  Community hospital  **3. Your department category is:**  Neurology  Psychiatry  Internal medicine  Other  **4. Your professional title is:**  Chief physician  Deputy chief physician  Attending physician  Resident physician  Nurse  Other  **5. Your years of work experience:**  **Clinical Impression**  **6. Is BPSD common in your clinical work?**  Yes  No  **7. Is BPSD important in your clinical work?**  Yes  No  **8. How do you evaluate BPSD in your clinical work?** [Multiple choice]  Clinical evaluation  Information by caregivers  Dedicated tools  **9. Which assessment tool do you use?**  NPI  NPI-Q  Behavioral Pathology Inventory for Alzheimer's Disease (BEHAVE-AD)  Others  **10. Which BPSD is more frequent?** [Multiple choice]  Agitation/aggression  Delusions  Hallucinations  Depression  Anxiety  Emotional instability  Sleep disturbances  Disinhibited behavior  Abnormal motor behavior (such as pacing, opening drawers and closets, pulling things, and tangling ropes)  Apathy  Changes in eating behavior  **11. What are the primary reasons for consultation?** [Multiple choice]  Agitation/aggression  Delusion  Hallucination  Depression  Anxiety  Emotional instability  Sleep disorders  Disinhibited behavior  Abnormal motor behavior (such as repeated pacing, repeated opening of drawers and closets, repeated pulling of objects, repeated winding of ropes, etc.)  Apathy  Changes in eating behavior  **Treatments**  **12. Do you usually treat apathy?**  Yes  No  **13. Do you think AChEIs are effective for BPSD?**  Yes  No  **14. Do you think memantine is effective for BPSD?**  Yes  No  **15. Do you think ginkgo biloba extract is effective for BPSD? If so, what is the degree of benefit?**  Ineffective  Mild benefit  Moderate benefit  High benefit  **16. What are the common adverse events of antipsychotics?** [Multiple choice]  Extrapyramidal adverse reactions (such as Parkinsonism, acute dystonia, akathisia, tardive dyskinesia, etc.)  Confusion/sedation  Cardiac/vascular (such as orthostatic hypotension, sinus tachycardia, etc.)  Cognitive impairment  Endocrine dysfunction (hyperprolactinemia, etc.)  Paradoxical effect  **17. What are the common adverse events of antidepressants?** [Multiple choice]  Gastrointestinal (such as nausea, diarrhea, gastric bleeding, indigestion)  Weight gain and metabolic abnormalities  Cardiac/vascular (such as heart rate, QT interval prolongation, hypertension, postural hypotension, etc.)  Urinary (such as urinary retention, urinary incontinence, etc.)  Sexual dysfunction  Ataxia  Confusion/sedation  Paradoxical effect  **18. What are the common adverse events of benzodiazepines?** [Multiple choice]  Ataxia  Confusion/sedation  Paradoxical effects  Durg dependence  **19. Do you usually prescribe drugs for BPSD in monotherapy or in polytherapy?**  Monotherapy  Polytherapy  **20. Do you use non-pharmacological treatments for BPSD?**  Yes  No  **21. Which non-pharmacological treatments do you usually use?** [Multiple choice]  Neuromodulation technology (such as transcranial magnetic stimulation, direct current stimulation, etc.)  Occupational therapy  Cognitive stimulation  Validation  Exercise therapy  Psychotherapy  Music therapy  Dietary changes  Traditional Chinese medicine treatment  Gentle care  Person centered care  **22. Which is your preferred treatment for aggression?**  Antidepressants  Atypical antipsychotics  Typical antipsychotics  Benzodiazepines  Antiepileptic drugs  Dopaminergic drugs  Non-drug interventions  Others  **23. Which is your preferred treatment for agitation?**  Antidepressants  Atypical antipsychotics  Typical antipsychotics  Benzodiazepines  Antiepileptic drugs  Dopaminergic drugs  Non-drug interventions  Others  **24. Which is your preferred treatment for anxiety?**  Antidepressants  Atypical antipsychotics  Typical antipsychotics  Benzodiazepines  Antiepileptic drugs  Dopaminergic drugs  Non-drug interventions  Others  **25. Which is your preferred treatment for apathy?**  Antidepressants  Atypical antipsychotics  Typical antipsychotics  Benzodiazepines  Antiepileptic drugs  Dopaminergic drugs  Drug interventions  Others  **26. Which is your preferred treatment for depression?**  Antidepressants  Atypical antipsychotics  Typical antipsychotics  Benzodiazepines  Antiepileptic drugs  Dopaminergic drugs  Drug interventions  Others  **27. Which is your preferred treatment for nutritional problems?**  Antidepressants  Atypical antipsychotics  Typical antipsychotics  Benzodiazepines  Antiepileptic drugs  Dopaminergic drugs  Non-drug interventions  Others  **28. Which is your preferred treatment for psychiatric symptoms?**  Antidepressants  Atypical antipsychotics  Typical antipsychotics  Benzodiazepines  Antiepileptic drugs  Dopaminergic drugs  Non-drug interventions  Others  **29. Which is your preferred treatment for sleep disorders?**  Antidepressants  Atypical antipsychotics  Typical antipsychotics  Benzodiazepines  Antiepileptic drugs  Dopaminergic drugs  Non-drug interventions  Others  **Exams and Assessments**  **30. Do you perform diagnostic exams for BPSD?**  Yes  No  **31. What procedures do you perform for BPSD?** [Multiple choice]  MRI  CT  FDG-PET  EEG  Other functional neuroimaging  Blood tests (such as blood routine, biochemistry, thyroid function, etc.)  Lumbar puncture  **32. Would you be interested in clinical scale specific for BPSD?**  Yes  No  **33. Would you be interested in biomarkers specific for BPSD?**  Yes  No |
| --- |
